# Supplementary material
Source: publisher figshare collection journal article supplement (https://future-science-group.figshare.com/ndownloader/files/29092596)
Supplement: Supplementary file 1 [file 29092596]

## Sheet: Sheet1
Supplemental Table 3: Top 25 mRNAs features and top 20 methylation features
Order	mRNAs features	ANOVA F-value	P-value		Order	methylation features	ANOVA-F value	P-value
1	MYBL2	296.16	6.35e-49		1	SNORD30_promoter	138	3.25e-27
2	PDE2A	280.71	4.74e-47		2	SNORD22_promoter	133.88	1.47e-26
3	EME1	256.06	5.78e-44		3	SNORD31_promoter	132.18	2.74e-26
4	C15orf42	249.68	3.81e-43		4	FLJ13224_promoter	121.93	1.25e-24
5	KIF2C	249.05	4.59e-43		5	SNORD87_promoter	111.4	6.96e-23
6	GALNTL2	247.15	8.09e-43		6	MIR1249_promoter	110.83	8.68e-23
7	TROAP	235.66	2.58e-41		7	NOLC1_promoter	109.23	1.61e-22
8	CDT1	232.11	7.6e-41		8	LANCL2_promoter	106.33	4.98e-22
9	TRIP13	232.01	7.83e-41		9	SNORA1_promoter	106.29	5.05e-22
10	BIRC5	231.95	7.97e-41		10	SNORD2_promoter	106.18	5.27e-22
11	CDC20	221.57	1.97e-39		11	SNORA18_promoter	105.74	6.26e-22
12	CDCA5	219.22	4.1e-39		12	COX10_promoter	99.22	8.14e-21
13	CENPM	217.92	6.16e-39		13	AKAP3_promoter	95.74	3.25e-20
14	KIF18B	216.39	9.95e-39		14	SNORD78_promoter	95.72	3.28e-20
15	AURKB	214.51	1.8e-38		15	C4orf19_promoter	95.38	3.75e-20
16	FANCI	214.38	1.87e-38		16	HCG26_promoter	93.49	8.01e-20
17	CENPA	212.66	3.23e-38		17	SNORD47_promoter	93.31	8.6e-20
18	GINS1	211.64	4.46e-38		18	SNORD80_promoter	93.31	8.6e-20
19	CCNB1	209.24	9.57e-38		19	SNORD81_promoter	93.31	8.6e-20
20	PLK1	209.23	9.6e-38		20	SNORD7_promoter	91.93	1.5e-19
21	CDCA3	208.76	1.11e-37
22	KIFC1	208.44	1.23e-37
23	CENPH	205.69	2.97e-37
24	NUF2	205.01	3.69e-37
25	FANCD2	204.92	3.8e-37
